# Supplementary material for: Two new layered metal chalcogenide frameworks as photocatalysts for highly efficient and selective dye degradation
Source: Royal Society of Chemistry journal article supplement (doi:10.1039/d0dt02454f), 2020-01-01
Supplement: d0dt02454f1.pdf [file d0dt02454f1.pdf]

*Supporting Information for*

**Two New Layered Metal Chalcogenide Frameworks as  
Photocatalysts for Highly Efficient and Selective Dye Degradation**

*Sijie Wu,<sup>a</sup> Zhou Wu,<sup>a</sup> Xiao-Li Wang,<sup>a</sup> Xiang Wang,<sup>a</sup> Rui, Zhou,<sup>a</sup> Dong-Sheng Li<sup>b</sup> and  
Tao Wu<sup>\*,a</sup>*

<sup>a</sup> College of Chemistry, Chemical Engineering and Materials Science, Soochow University, Suzhou, Jiangsu 215123, China.

<sup>b</sup> College of Materials and Chemical Engineering, Hubei Provincial Collaborative Innovation Center for New Energy Microgrid, Key Laboratory of Inorganic Nonmetallic Crystalline and Energy Conversion Materials, China Three Gorges University, Yichang, Hubei 443002, China.

\* Corresponding author E-mail: [wutao@suda.edu.cn](mailto:wutao@suda.edu.cn)

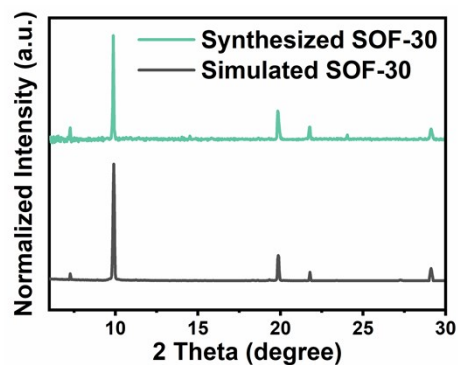

**Figure S1.** Powder X-ray diffraction (PXRD) patterns of as-synthesized **SOF-30** and its simulated one.

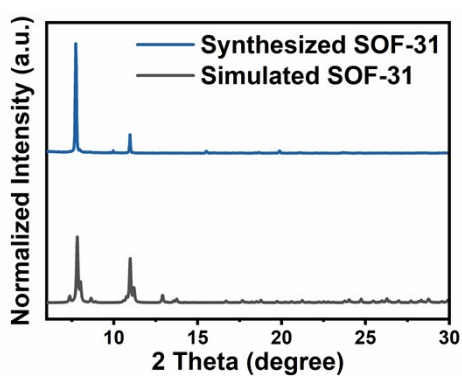

**Figure S2.** Powder X-ray diffraction (PXRD) patterns of as-synthesized **SOF-31** and its simulated one.

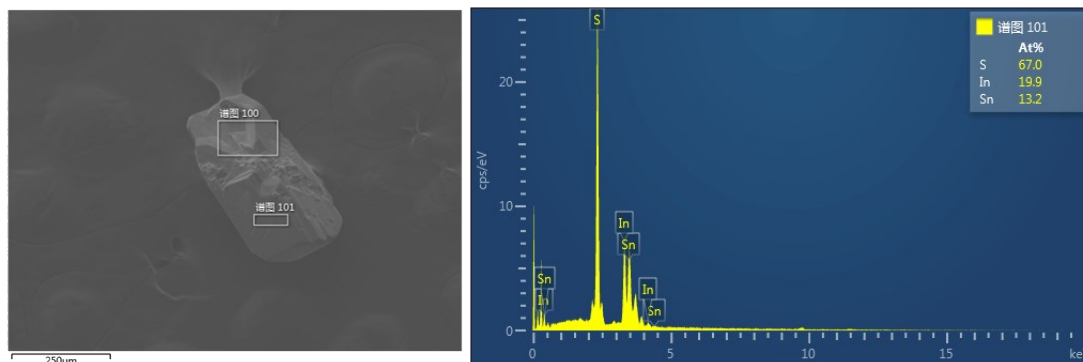

**Figure S3.** Left: SEM image of as-synthesized **SOF-30**. Right: EDS of **SOF-30**.

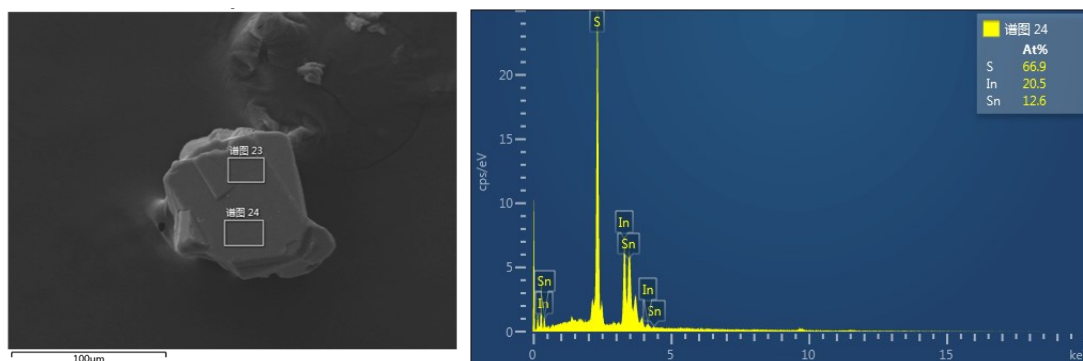

**Figure S4.** Left: SEM image of as-synthesized **SOF-31**. Right: EDS of **SOF-31**.

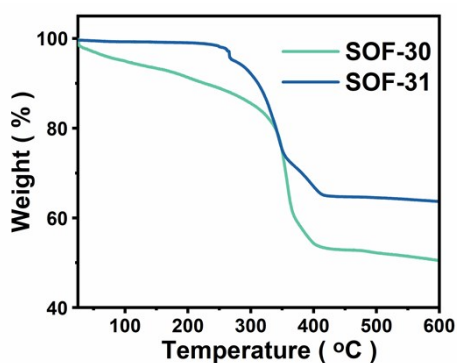

**Figure S5.** TG curves of **SOF-30** and **SOF-31**. The initial gradual weight loss of 15% and 8% between 30-100°C could be attributed to loss of moisture and solvent adsorbed on the surface of **SOF-30** and **SOF-31**. A further abrupt weight loss of 47% and 35% between 200-450°C are attributed to the carbonization of template of **SOF-30** and **SOF-31**, respectively.

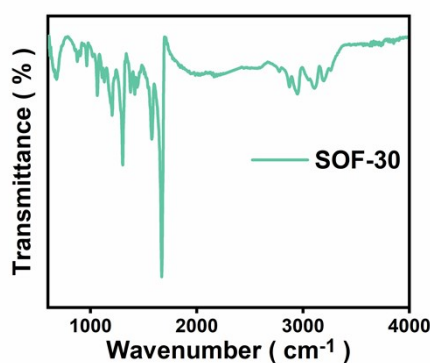

**Figure S6.** FT-IR spectrum of **SOF-30**.

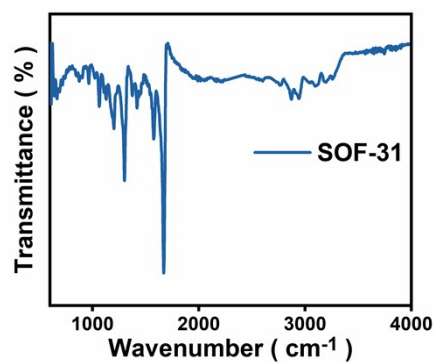

**Figure S7.** FT-IR spectrum of **SOF-31**.

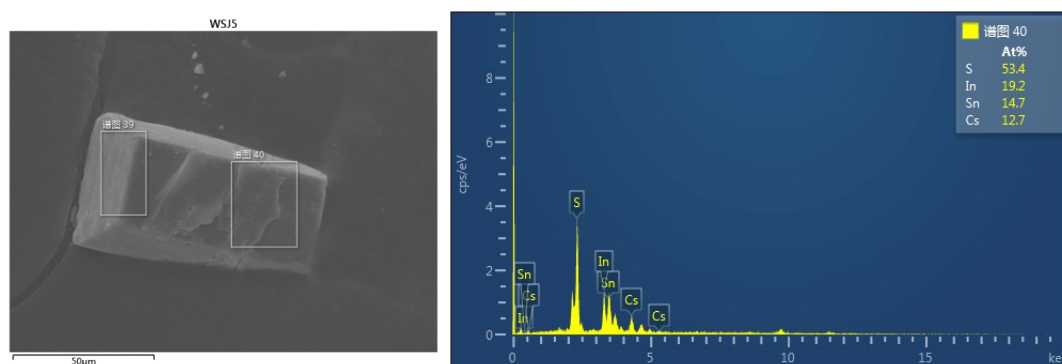

**Figure S8.** Left: SEM image of as-synthesized **Cs@SOF-30**. Right: EDS of **Cs@SOF-30**.

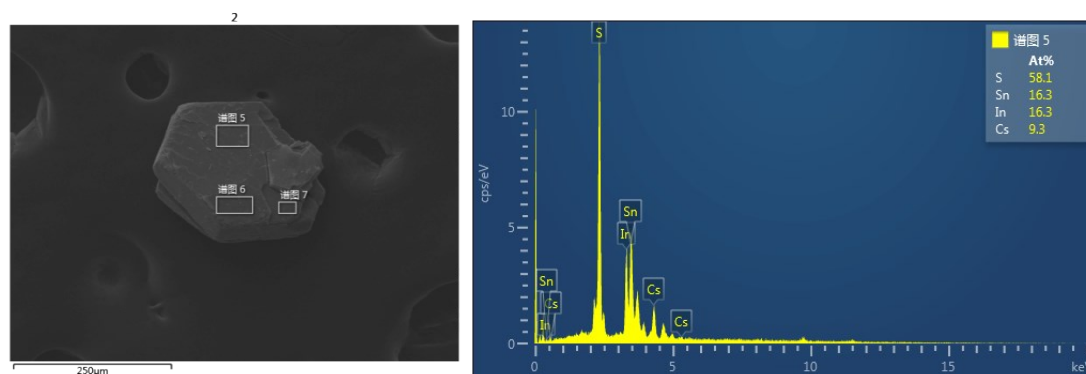

**Figure S9.** Left: SEM image of as-synthesized **Cs@SOF-31**. Right: EDS of **Cs@SOF-31**.

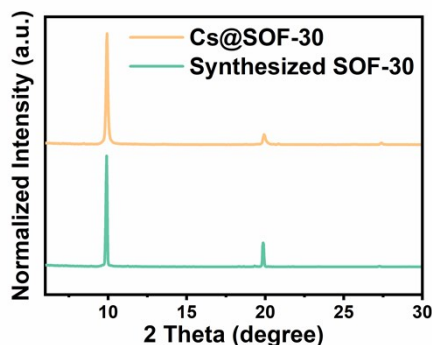

**Figure S10.** Powder X-ray diffraction (PXRD) patterns of Cs@SOF-30.

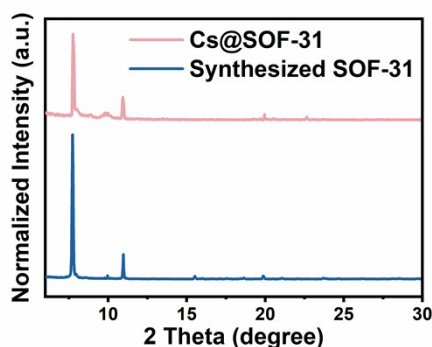

**Figure S11.** Powder X-ray diffraction (PXRD) patterns of Cs@SOF-31.

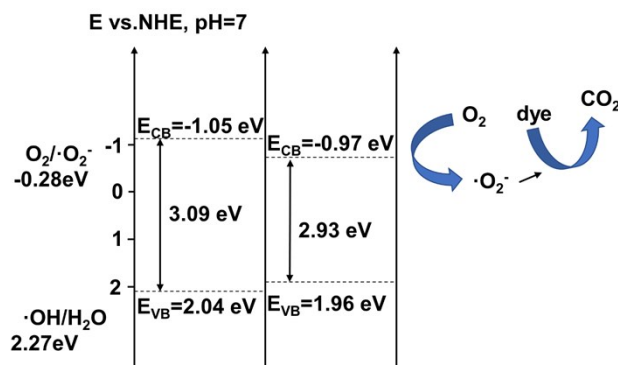

**Figure S12.** Schematic representation of the band-edge positions of in SOF-30 and SOF-31.

Let take **SOF-30** as example. The minimum of CB in **SOF-30** is negative than  $E_{O_2/\cdot O_2^-}$  (-0.28 V vs. NHE, pH=7). When the electrons are excited from the valence band (VB) to the CB under light irradiation, the photogenerated electrons can capture surface chemically adsorbed  $O_2$  molecules to yield the superoxide radical  $\cdot O_2^-$ , which could further participate in the degradation of dye molecules. In addition, the VB is positive than  $E_{\cdot OH/H_2O}$  (+2.27 V vs. NHE, pH=7), the holes in VB can oxidize  $H_2O$  molecules to yield reactive  $\cdot OH$  species. These reactive radicals contribute to the degradation of dye to  $H_2O$  and  $CO_2$  as the final products.

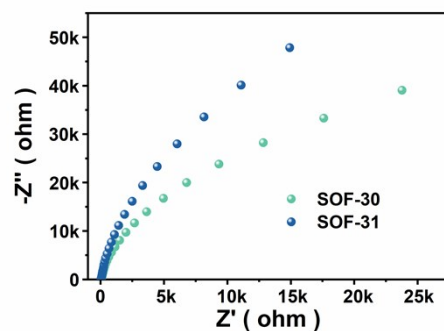

**Figure S13.** EIS Nyquist plots of **SOF-30** and **SOF-31** electrodes.

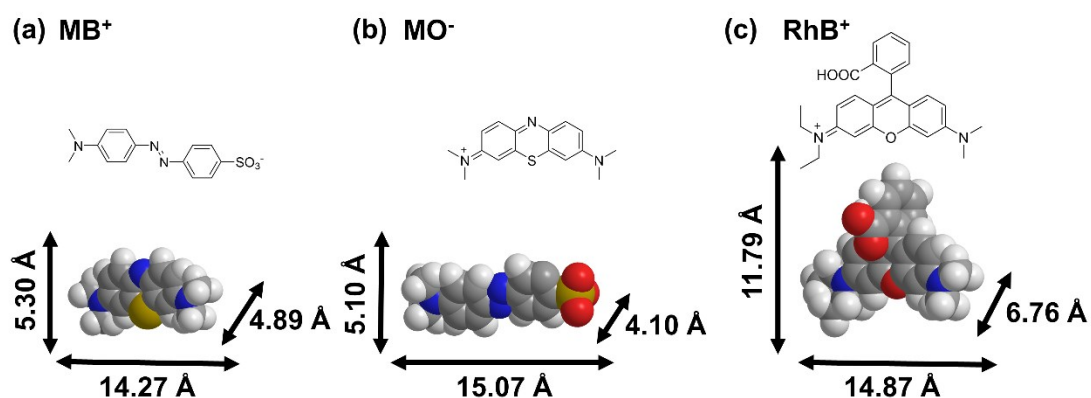

**Figure S14.** Chemical structures and dimensions (Å) of different dye molecules.

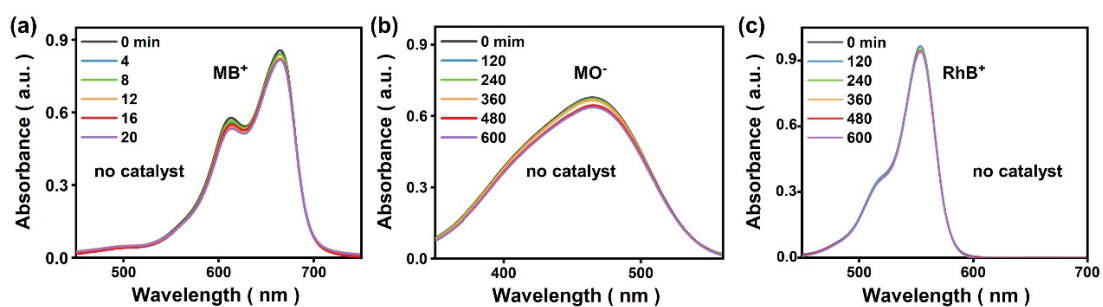

**Figure S15.** Absorbance under the photocatalytic degradation conditions without catalyst for **MB<sup>+</sup>** (a), **MO<sup>-</sup>** (b) and **RhB<sup>+</sup>**(c).

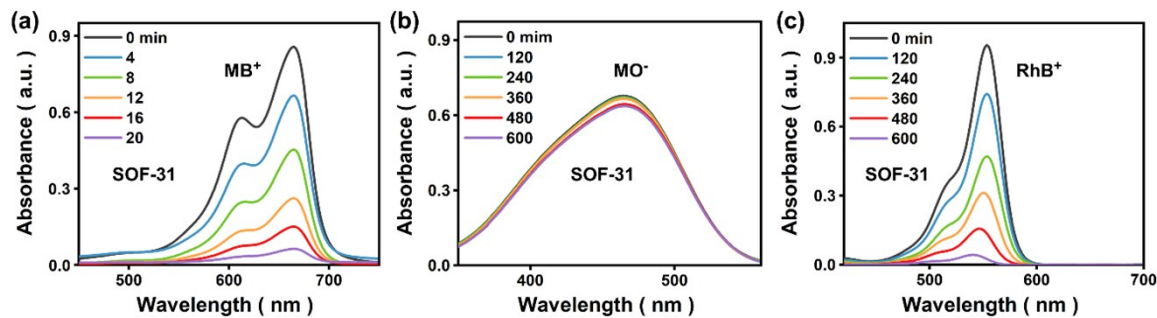

**Figure S16.** Absorbance under the photocatalytic degradation conditions of **SOF-31** for MB<sup>+</sup> (a), MO<sup>-</sup> (b) and RhB<sup>+</sup> (c).

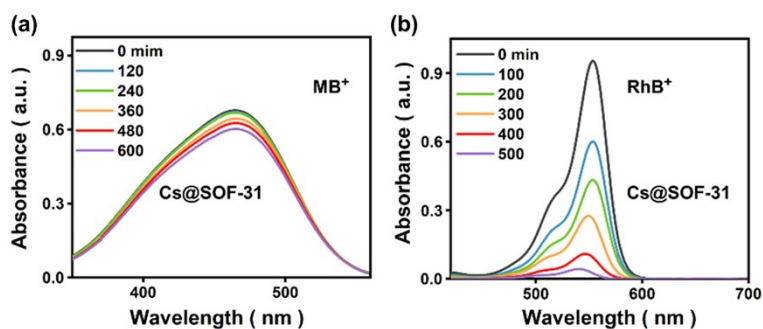

**Figure S17.** Absorbance under the photocatalytic degradation conditions of **Cs@SOF-31** for MB<sup>+</sup> (a) and RhB<sup>+</sup> (b).

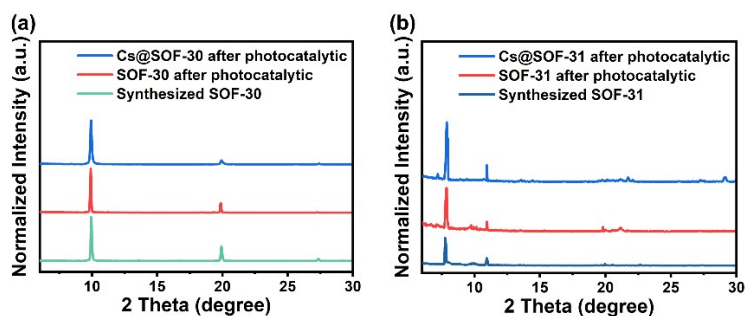

**Figure S18.** PXRD patterns of as-synthesized **SOF-30** and **Cs@SOF-30** (a); **SOF-31** and **Cs@SOF-31** (b) after photocatalytic experiment.

**Table S1.** Crystal data and refinement results of **SOF-30** and **SOF-31**.

| <b>Compounds</b>                                                           | <b>SOF-30</b>                                      | <b>SOF-31</b>                                      |
|----------------------------------------------------------------------------|----------------------------------------------------|----------------------------------------------------|
| Framework formula                                                          | [In <sub>4</sub> Sn <sub>2</sub> S <sub>12</sub> ] | [In <sub>5</sub> Sn <sub>3</sub> S <sub>17</sub> ] |
| Formula weight                                                             | 1081.38                                            | 1494.54                                            |
| Crystal system                                                             | Monoclinic                                         | Orthorhombic                                       |
| <i>Z</i>                                                                   | 4                                                  | 4                                                  |
| Space group                                                                | <i>P2<sub>1</sub>/c</i>                            | <i>Pccn</i>                                        |
| <i>a</i> (Å)                                                               | 13.0435 (7)                                        | 23.9507 (16)                                       |
| <i>b</i> (Å)                                                               | 35.1784 (17)                                       | 12.4142 (9)                                        |
| <i>c</i> (Å)                                                               | 10.3323 (5)                                        | 22.5931 (16)                                       |
| $\alpha$ (°)                                                               | 90                                                 | 90                                                 |
| $\beta$ (°)                                                                | 91.933 (2)                                         | 90                                                 |
| $\gamma$ (°)                                                               | 90                                                 | 90                                                 |
| <i>V</i> (Å <sup>3</sup> )                                                 | 4738.3 (4)                                         | 6717.6 (8)                                         |
| <i>T</i> (K)                                                               | 119.89                                             | 119.99                                             |
| <i>F</i> (000)                                                             | 1952.0                                             | 2688.0                                             |
| <i>D</i> (g/cm <sup>-3</sup> )                                             | 1.516                                              | 1.478                                              |
| Collected reflections                                                      | 46448                                              | 34257                                              |
| Independent reflections                                                    | 8658                                               | 6452                                               |
| GOF on <i>F</i> <sup>2</sup>                                               | 1.042                                              | 1.008                                              |
| <i>R</i> <sub>1</sub> , <i>wR</i> <sub>2</sub> ( <i>I</i> >2σ( <i>I</i> )) | 0.0423,0.1095                                      | 0.0493,0.1390                                      |
| <i>R</i> <sub>1</sub> , <i>wR</i> <sub>2</sub> (all data)                  | 0.0580,0.1189                                      | 0.1289,0.1906                                      |

**Table S2.** Elemental analysis results of **SOF-30** and **SOF-31**.

|               | <b>Elements (wt.)</b> | <b>N (%)</b> | <b>C (%)</b> | <b>H (%)</b> |
|---------------|-----------------------|--------------|--------------|--------------|
| <b>SOF-30</b> | Calculated            | 6.35         | 20.08        | 3.20         |
|               | Experimental          | 6.42         | 19.78        | 3.20         |
| <b>SOF-31</b> | Calculated            | 5.53         | 20.91        | 3.92         |
|               | Experimental          | 5.47         | 20.78        | 3.90         |
